# Supplementary material
Source: PubMed Central journal article supplement (PMC8289710)
Supplement: NIHMS1707422-supplement-SI_figs_and_text.pdf [file NIHMS1707422-supplement-SI_figs_and_text.pdf]

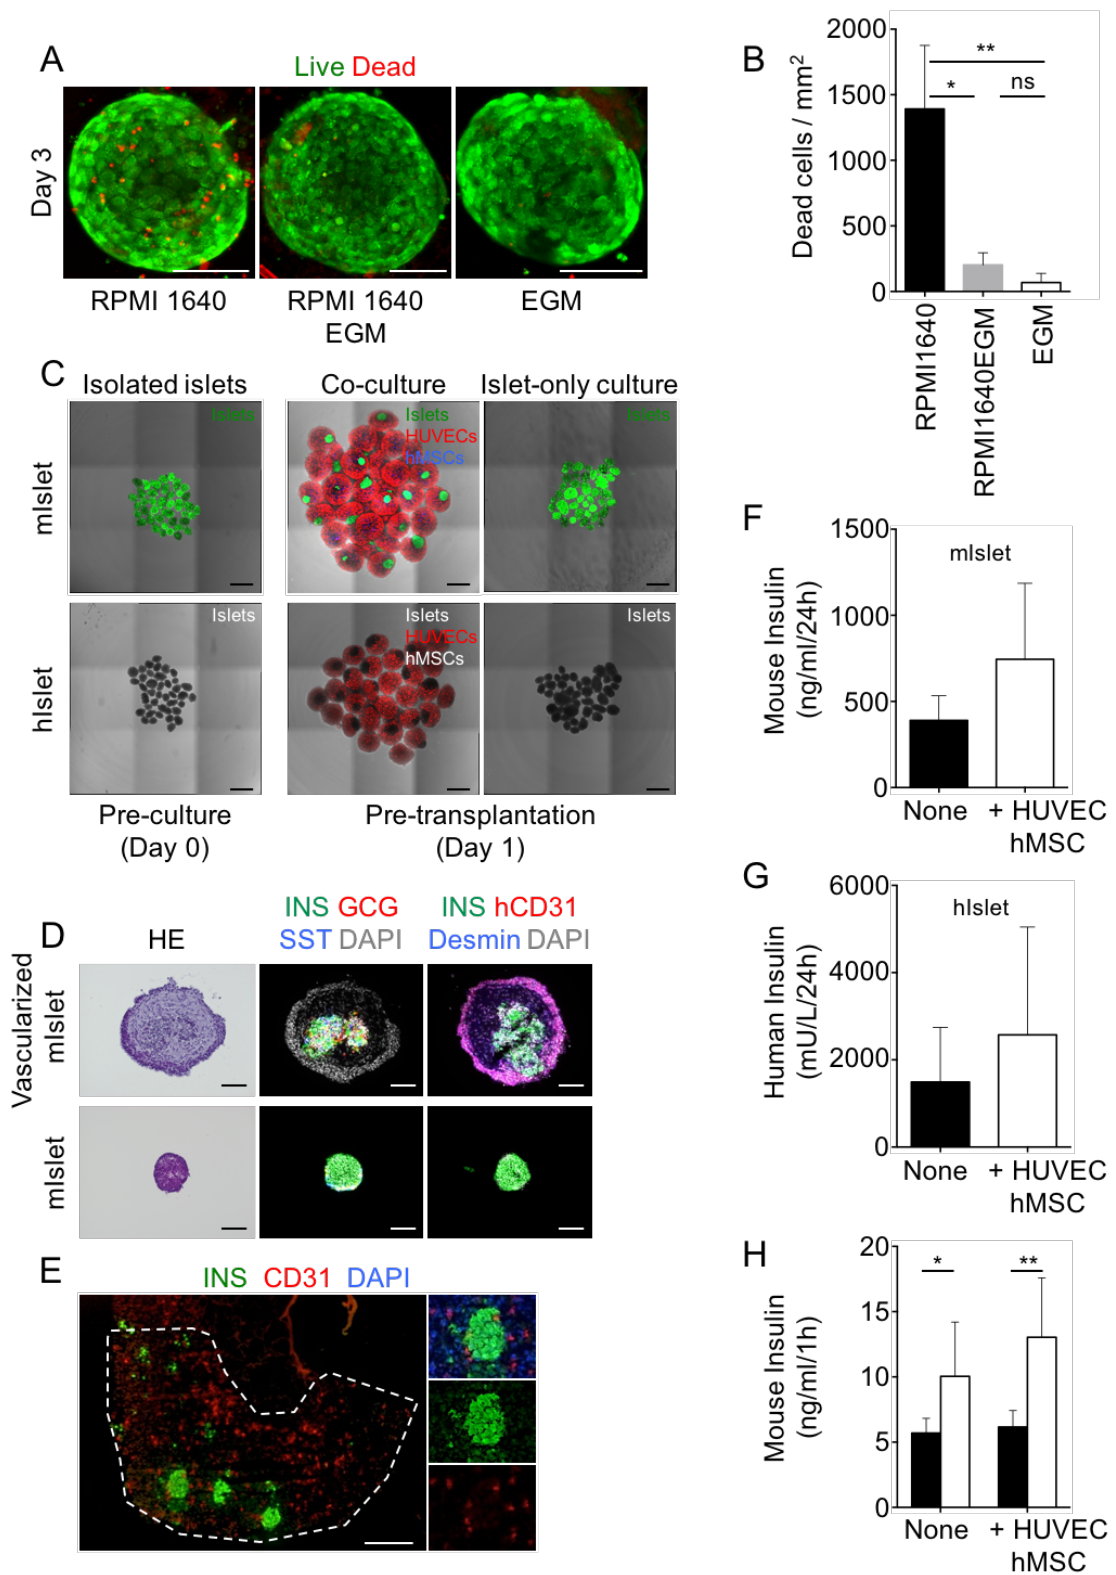

## Supplementary Figure 1.

### The culture conditions for the vascularization of functional primary pancreatic islets, Related to Figure 1.

(A) LIVE/DEAD cell viability assay. Green, live cell; red, dead cell. Bars, 75  $\mu\text{m}$ .

(B) Quantification of (A). The data represent the mean  $\pm$  SD,  $n = 3$ ,  $**P < 0.01$ ,  $*P < 0.05$ , ns: not significant.

(C) Confocal microscopy imaging of the pre-transplantation islet alone (right), mini-sized vascularized islet (middle) and pre-culture islet alone (left). Islet, green or unlabeled; HUVECs, red; human MSCs, blue or unlabeled. Bars, 500  $\mu\text{m}$ .

(D, E) Hematoxylin and eosin and immunofluorescence staining of the pre-transplantation vascularized islet (upper), islet alone (lower). INS, insulin; GCG, glucagon; SST, somatostatin; hCD31, human CD31. Bars, 100  $\mu\text{m}$ .

(F, G) *In vitro* insulin secretion. The data represent the mean  $\pm$  SD, ns: not significant,  $n = 7$  and 4 mouse and human islet, respectively.

(H) *In vitro* glucose stimulated insulin secretion. The data represent the mean  $\pm$  SD,  $n = 5$  mouse islet alone and mouse islet + HUVECs and human MSCs,  $**P < 0.01$ ,  $*P < 0.05$ .

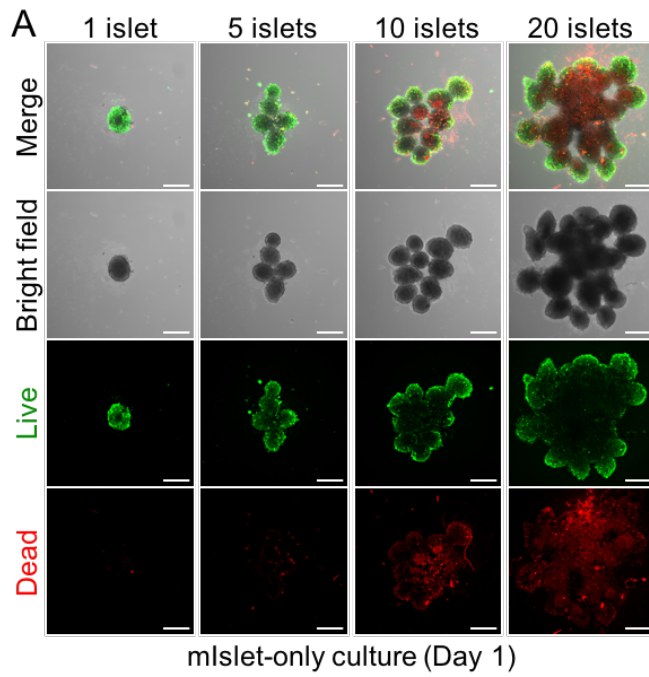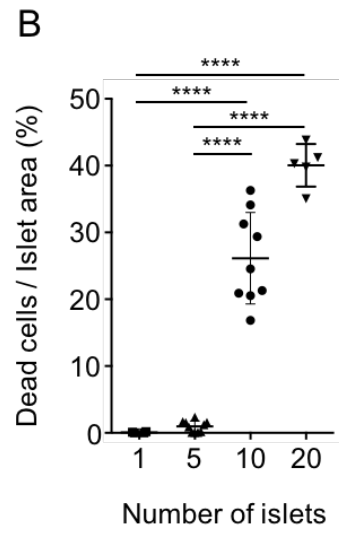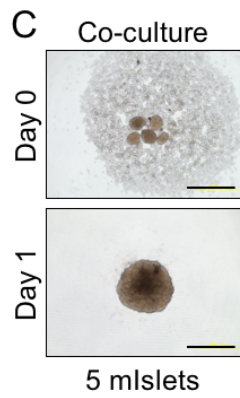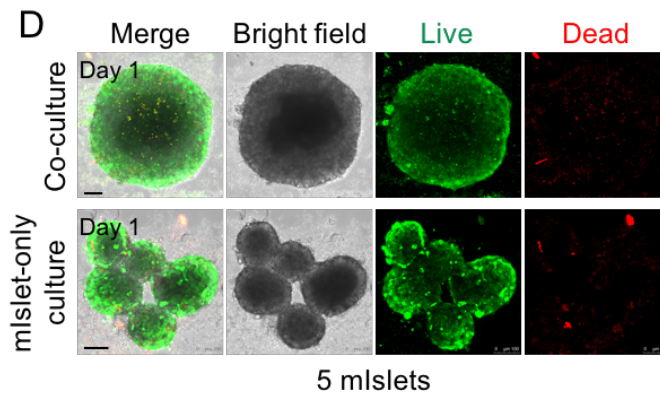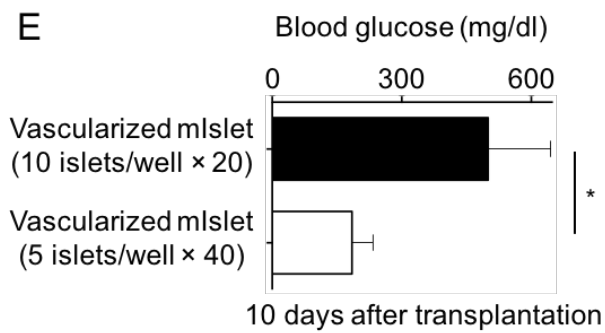

## Supplementary Figure 2.

### Optimization of pancreatic islets number in vascularized islet, Related to Figure 2.

(A) LIVE/DEAD cell viability assay. Green, live cell; red, dead cell. Bars, 250  $\mu\text{m}$ .

(B) Quantification of (A).  $n = 4$  (1 islet/well), 10 (5 islets/well), 9 (10 islets/well) and 5 (20 islets/well), respectively. The data represent the mean  $\pm$  SD, \*\*\*\* $P < 0.0001$ .

(C) Optimization of the number of pancreatic islets in the mouse vascularized islet. Isolated mouse Islets were aggregated in culture medium using low-cell-adhesion 96-well plates with U-bottomed conical wells. 24 h later mini-sized vascularized mouse islet autonomously formed. Bars, 500  $\mu\text{m}$ .

(D) LIVE/DEAD cell viability assay. Green, live cell; red, dead cell. Bars, 100  $\mu\text{m}$ .

(E) Blood glucose measurements of the progressively diabetic mice. The blood glucose level of the diabetic mice were monitored 10 days after transplantation. The data represent the mean  $\pm$  SD,  $n = 3$  vascularized mouse islet (5 islets/well  $\times$  40),  $n = 3$  vascularized mouse islet (10 islets/well  $\times$  20). The data represent the mean  $\pm$  SD, \* $P < 0.05$ .

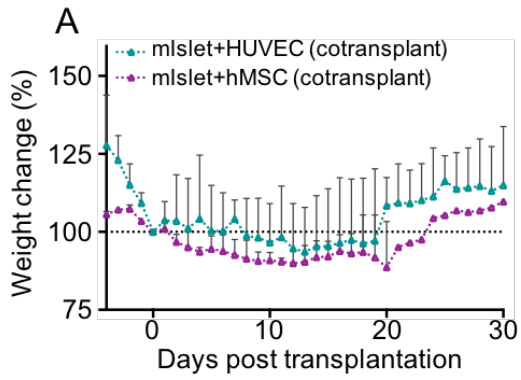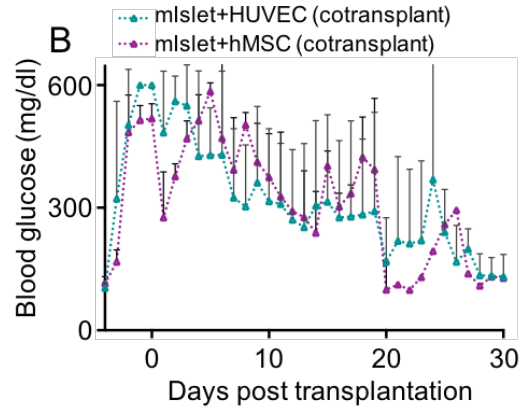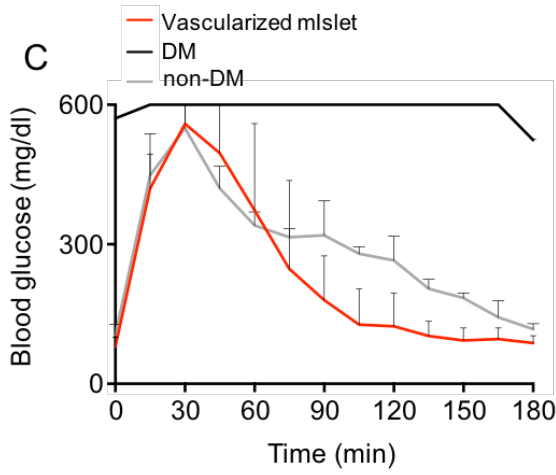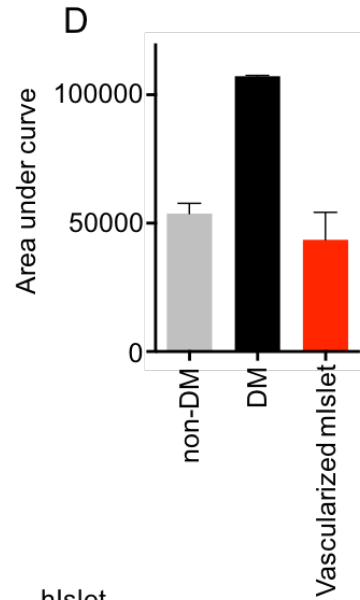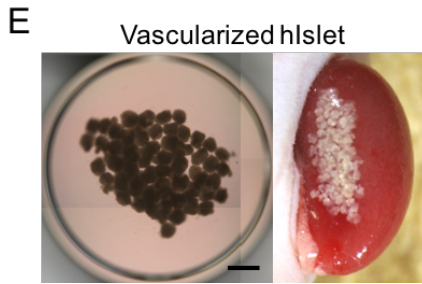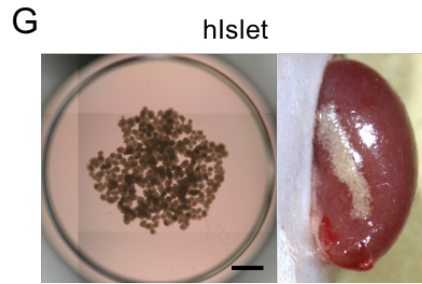

### **Supplementary Figure 3.**

#### **Vascularized islet transplantation normalized blood glucose levels in diabetic mice, Related to Figure 2.**

(A) Percentage of body weight variations in the diabetic mice. The data represent the mean  $\pm$  SD,  $n = 4$  mouse islet + HUVECs,  $n = 2$  mouse islet + human MSCs.

(B) Blood glucose measurements of the progressively diabetic mice. The glucose measurements were saturated at 600 mg/dl. The data represent the mean  $\pm$  SD,  $n = 4$  mouse islet + HUVECs,  $n = 2$  mouse islet + human MSC.

(C) Glucose tolerance testing 35 days after transplantation. The data represent the mean  $\pm$  SD,  $n = 3$  vascularized mouse islet,  $n = 2$  DM mice,  $n = 2$  non-DM mice.

(D) Area under the curve for (A). Data represent the means  $\pm$  SD.

(E, F) Brightfield image of the collected human islets (left) and recipient kidneys after transplantation (right). Bars, 500  $\mu$ m. Images are a montage created by merging views at 4X objective lens using powerpoint.
